# Supplementary material for: CBS-derived H2S facilitates host colonization of Vibrio cholerae by promoting the iron-dependent catalase activity of KatB
Source: PubMed Central journal article supplement (PMC8324212; doi:10.1371/journal.ppat.1009763), 2021-07-20
Supplement: ppat.1009763.s001.pdf [file ppat.1009763.s001.pdf]

## A. *cbs* candidates

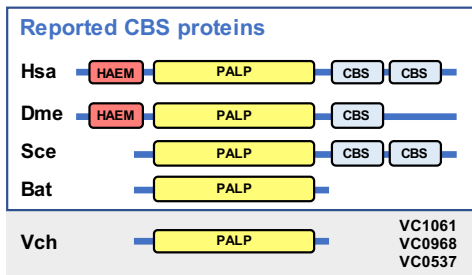

- Hsa: *Homo sapiens*
- Dme: *Drosophila melanogaster*
- Sce: *Saccharomyces cerevisiae* S288C
- Bat: *Bacillus anthracis* str. Sterne
- Vch: *Vibrio cholerae*

### Alignment for PALP:

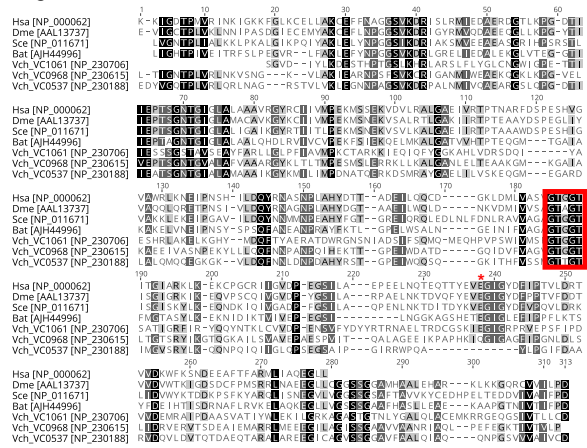

## B. *cse* candidates

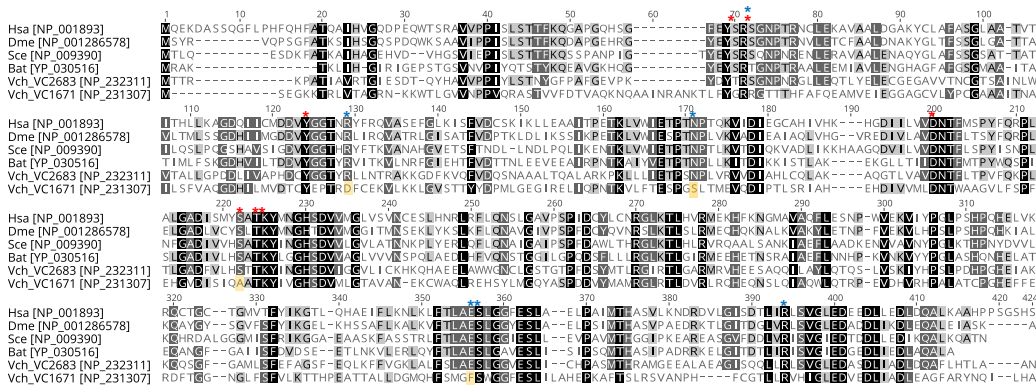

## C. *3mst* candidates

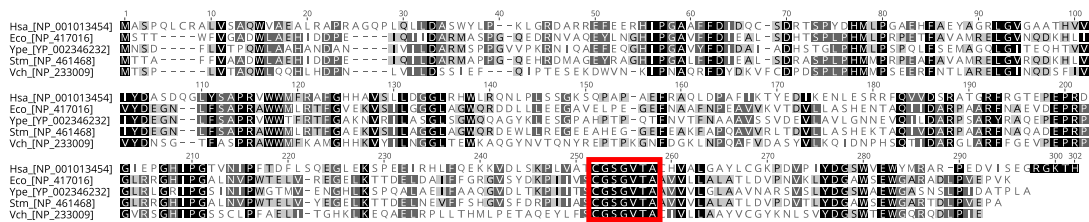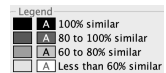

S1 Fig. Identification of orthologs for H<sub>2</sub>S-producing enzymes in *V. cholerae*.

(A) CBS orthologs. Left panel, domain architectures of CBS proteins are presented. In

CBS proteins, the catalytic core domain PALP (pfam00291) is highly conserved

across phyla [1]. There are three PALP-containing proteins in *V. cholerae*, encoding

by *vc1061*, *vc0968*, and *vc0537*, respectively. Right panel, multiple sequence alignment (MSA) of PALP regions, showing that all the three CBS candidate proteins in *V. cholerae* have the active-site loop residues of CBS (outlined with red) <sup>[1-4]</sup>. However, only VC1061 processes the key site for the function of H<sub>2</sub>S biogenesis reported by Devi et al. 2017 <sup>[1]</sup> (red asterisk).

(B) CSE orthologs. Cys/Met metabolism PLP-dependent domain (Cys\_Met\_Meta\_PP, pfam01053) is the conserved domain in CSE proteins. *V. cholerae* encodes two Cys\_Met\_Meta\_PP enzymes VC2683 and VC1671. Red and blue asterisks indicate key active-site residues in binding with co-factor pyridoxal-5'-phosphate (PLP) and inhibitor DL-propargylglycine (PAG), respectively <sup>[5]</sup>. VC1671 is not a CSE homolog, since it lacks four key active-site residues (shaded with yellow).

(C) 3MST orthologs. Active-site loop residues of 3MST are shown in red <sup>[6]</sup>. Hsa, *Homo sapiens*; Dme, *Drosophila melanogaster*; Sce, *Saccharomyces cerevisiae* S288C; Bat, *Bacillus anthracis* str. Sterne; Eco, *Escherichia coli*; Ype, *Yersinia pestis* CO92; Stm, *Salmonella typhimurium* LT2; Vch, *V. cholerae*.

## Reference

1. Devi S, Rehman SAA, Tarique KF, Gourinath S. Structural characterization and functional analysis of cystathionine beta-synthase: an enzyme involved in the reverse transsulfuration pathway of *Bacillus anthracis*. *Febs J.* 2017;284(22):3862-80. doi: 10.1111/febs.14273. PubMed PMID: WOS:000415877100009.
2. Koutmos M, Kabil O, Smith JL, Banerjee R. Structural basis for substrate activation and regulation by cystathionine beta-synthase (CBS) domains in

cystathionine {beta}-synthase. Proc Natl Acad Sci U S A. 2010;107(49):20958-63. Epub 2010/11/18. doi: 10.1073/pnas.1011448107. PubMed PMID: 21081698; PubMed Central PMCID: PMC3000283.

3. Meier M, Janosik M, Kery V, Kraus JP, Burkhard P. Structure of human cystathionine beta-synthase: a unique pyridoxal 5'-phosphate-dependent heme protein. The EMBO journal. 2001;20(15):3910-6. Epub 2001/08/03. doi: 10.1093/emboj/20.15.3910. PubMed PMID: 11483494; PubMed Central PMCID: PMC149156.

4. Tu Y, Kreinbring CA, Hill M, Liu C, Petsko GA, McCune CD, et al. Crystal Structures of Cystathionine  $\beta$ -Synthase from *Saccharomyces cerevisiae*: One Enzymatic Step at a Time. Biochemistry. 2018;57(22):3134-45. doi: 10.1021/acs.biochem.8b00092. PMID: 29630349; PMCID: PMC6496941.

5. Sun Q, Collins R, Huang S, Holmberg-Schiavone L, Anand GS, Tan CH, et al. Structural basis for the inhibition mechanism of human cystathionine gamma-lyase, an enzyme responsible for the production of H<sub>2</sub>S. J Biol Chem. 2009;284(5):3076-85. Epub 2008/11/21. doi: 10.1074/jbc.M805459200. PubMed PMID: 19019829.

6. Shatalin K, Shatalina E, Mironov A, Nudler E. H<sub>2</sub>S: A Universal Defense Against Antibiotics in Bacteria. Science. 2011;334(6058):986-90. doi: 10.1126/science.1209855. PubMed PMID: WOS:000297101800058.
