# Supplementary material for: CBS-derived H2S facilitates host colonization of Vibrio cholerae by promoting the iron-dependent catalase activity of KatB
Source: PubMed Central journal article supplement (PMC8324212; doi:10.1371/journal.ppat.1009763), 2021-07-20
Supplement: ppat.1009763.s002.pdf [file ppat.1009763.s002.pdf]

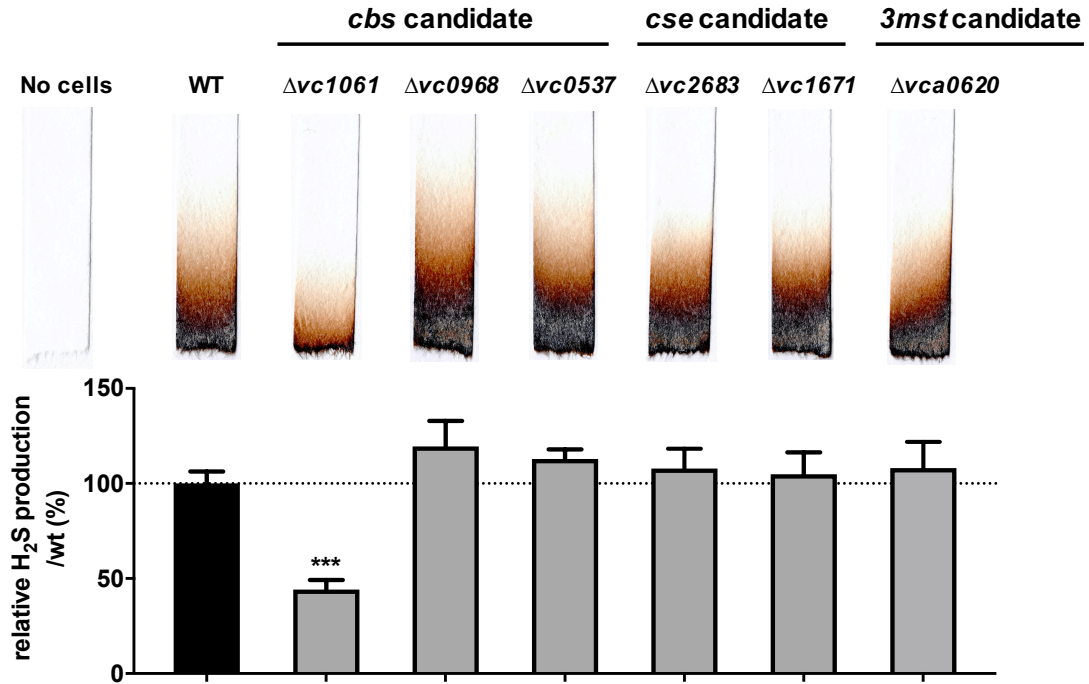

**S2 Fig. H<sub>2</sub>S production in deletion mutants of *V. cholerae* *cbs*, *cse*, and *3mst* candidates.**

Overnight cultures of single deletion for homologs of *cbs*, *cse*, and *3mst* were 1:100 sub-cultured into fresh Luria–Bertani broth containing 500 μM L-cysteine

hydrochloride, followed by stationary incubation at 37°C for 18 hrs. H<sub>2</sub>S production was measured by the darkening of Pb(Ac)<sub>2</sub> paper stripe during cultivation. The

average H<sub>2</sub>S level of the wild-type was set to be 100% for subsequent normalization.

Three replicates were sampled for each strain. Significance was determined by *t*-test;

*p*-value: \*\*\*, <0.001.
