# Supplementary material for: CBS-derived H2S facilitates host colonization of Vibrio cholerae by promoting the iron-dependent catalase activity of KatB
Source: PubMed Central journal article supplement (PMC8324212; doi:10.1371/journal.ppat.1009763), 2021-07-20
Supplement: ppat.1009763.s004.pdf [file ppat.1009763.s004.pdf]

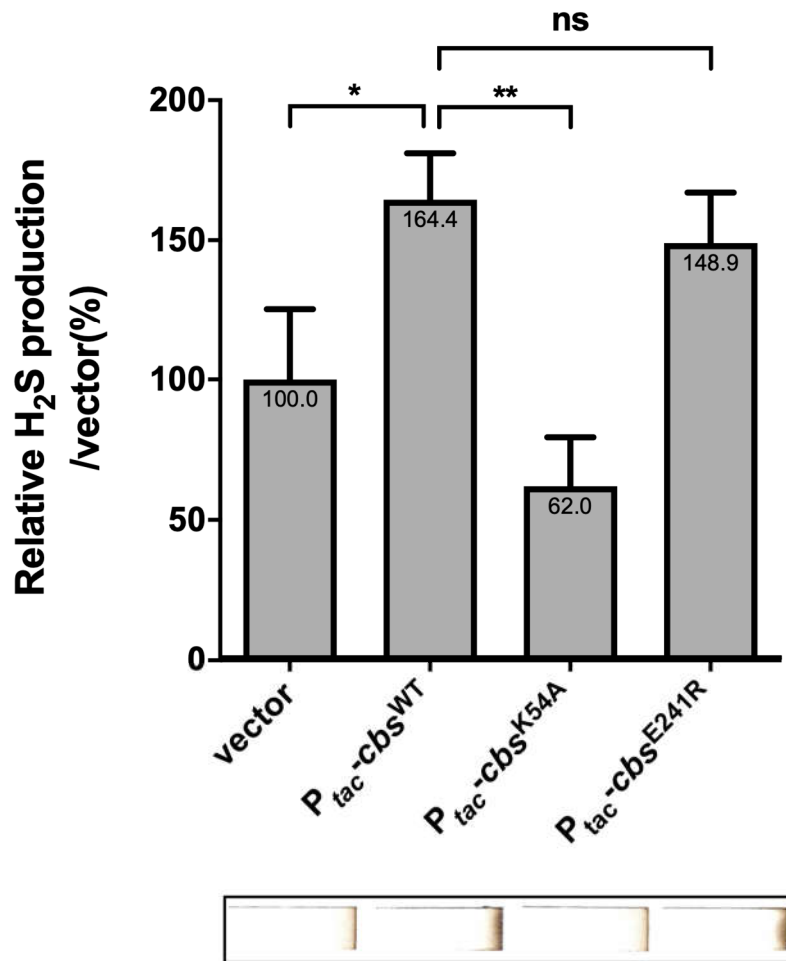

**S4 Fig. Identification of key sites for H<sub>2</sub>S production by *V. cholerae* CBS.**

H<sub>2</sub>S production of  $\Delta cbs$  expressing wild-type and point-mutated CBS was examined using Pb(Ac)<sub>2</sub> paper strips in LB with supplementation of 200  $\mu$ M L-cysteine hydrochloride. Stained paper strips were scanned and quantified with ImageJ. Average H<sub>2</sub>S level of the  $\Delta cbs$ /vector was set to 100% for subsequent normalization. Three replicates were sampled for each strain. Asterisks indicate statistically significant differences by *t*-test (\*, *p*-value < 0.05, \*\*, *p*-value < 0.01, ns, not significant).
