# Supplementary material for: CBS-derived H2S facilitates host colonization of Vibrio cholerae by promoting the iron-dependent catalase activity of KatB
Source: PubMed Central journal article supplement (PMC8324212; doi:10.1371/journal.ppat.1009763), 2021-07-20
Supplement: ppat.1009763.s005.pdf [file ppat.1009763.s005.pdf]

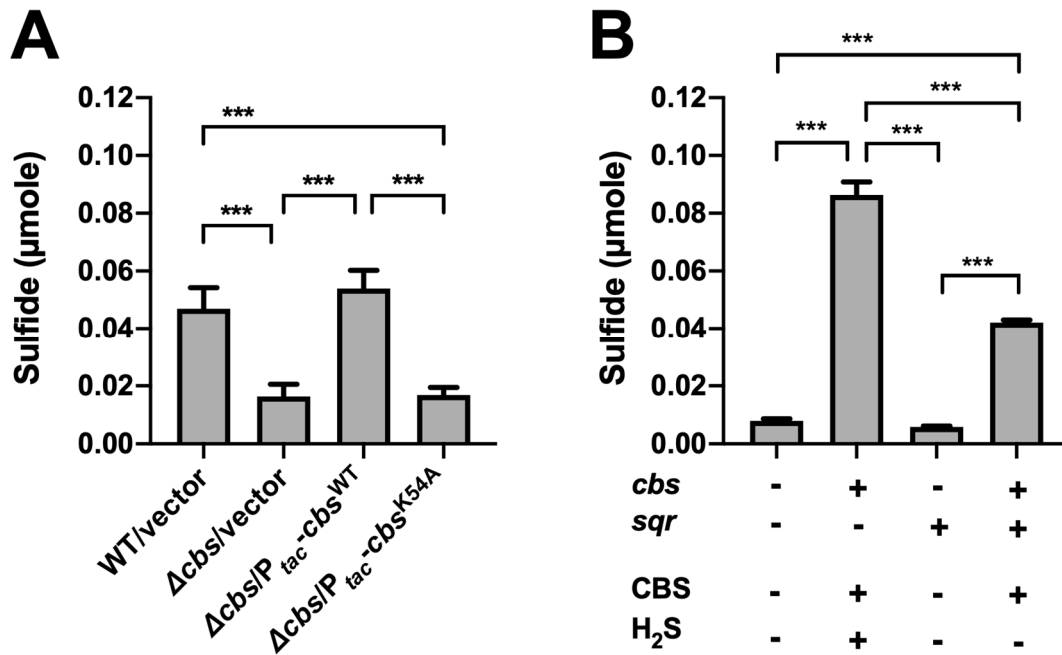

**S5 Fig. Semi-quantification of H<sub>2</sub>S production illustrated in Fig 2.**

Bacteria were cultured in M9 minimal medium (M9 salts plus 2 mM MgSO<sub>4</sub>, 0.1 mM CaCl<sub>2</sub>, and 0.2% casein acid hydrolysate as sole carbon source) containing appropriate antibiotic and inducers. H<sub>2</sub>S production during growth was monitored with lead acetate paper strips in anaerobic test tubes. Paper strips were scanned for quantification of H<sub>2</sub>S yield, with reference to NaHS standard. The calibration curve for sulfide was  $Y = 3 \times 10^6 x - 3955.4$  ( $R^2 = 0.9993$ ), for X representing the amount of sulfide (µmole) and Y representing the integrated density of gray values measured with ImageJ software. Significance was determined by *t*-test; *p*-value: \*\*\*, <0.001.
