# Supplementary material for: CBS-derived H2S facilitates host colonization of Vibrio cholerae by promoting the iron-dependent catalase activity of KatB
Source: PubMed Central journal article supplement (PMC8324212; doi:10.1371/journal.ppat.1009763), 2021-07-20
Supplement: ppat.1009763.s006.pdf [file ppat.1009763.s006.pdf]

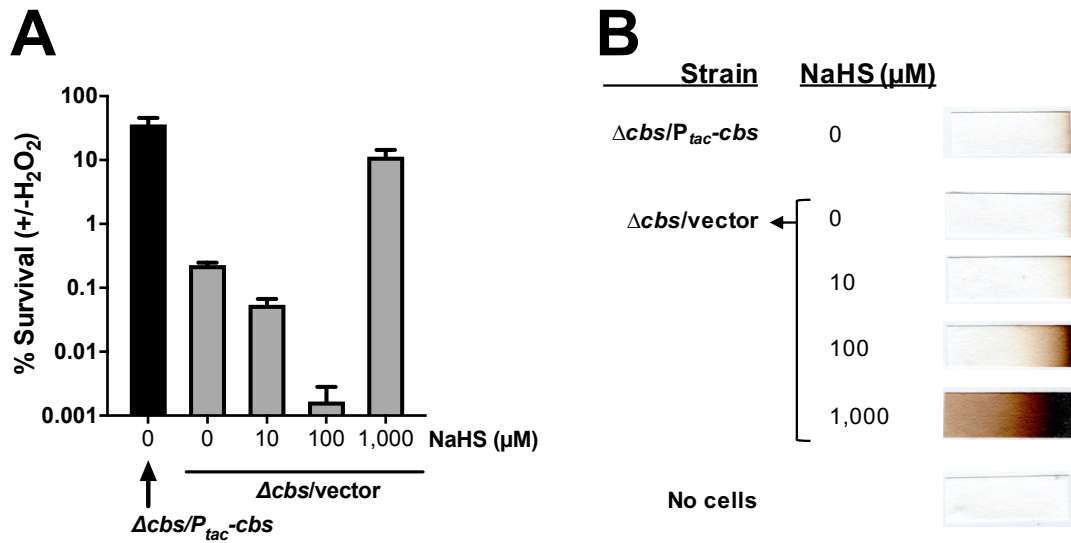

**S6 Fig. Compared with CBS-derived H<sub>2</sub>S, exogenous H<sub>2</sub>S was less effective in protecting *V. cholerae* cells from H<sub>2</sub>O<sub>2</sub>.**

(A) Survival of  $\Delta cbs$  in M9 minimal medium (M9 salts plus 2 mM MgSO<sub>4</sub>, 0.1 mM CaCl<sub>2</sub>) plus 0.2% casein acid hydrolysate, when NaHS, the rapid donor of H<sub>2</sub>S, was supplied 1hr before under H<sub>2</sub>O<sub>2</sub> challenge. 1 mM of H<sub>2</sub>O<sub>2</sub> treatment was performed on log-phase bacteria for 30 min.

(B) Semi-quantification of CBS-derived H<sub>2</sub>S production in M9 minimal medium with 0.2% casein acid hydrolysate as the sole carbon source. H<sub>2</sub>S production within 6 hrs was examined with Pb(Ac)<sub>2</sub> paper strips, and compared with NaHS standards (0, 10 μM, 100 μM, 1 mM). *cbs* expression was induced by 200 μM IPTG.
