# Supplementary material for: CBS-derived H2S facilitates host colonization of Vibrio cholerae by promoting the iron-dependent catalase activity of KatB
Source: PubMed Central journal article supplement (PMC8324212; doi:10.1371/journal.ppat.1009763), 2021-07-20
Supplement: ppat.1009763.s007.pdf [file ppat.1009763.s007.pdf]

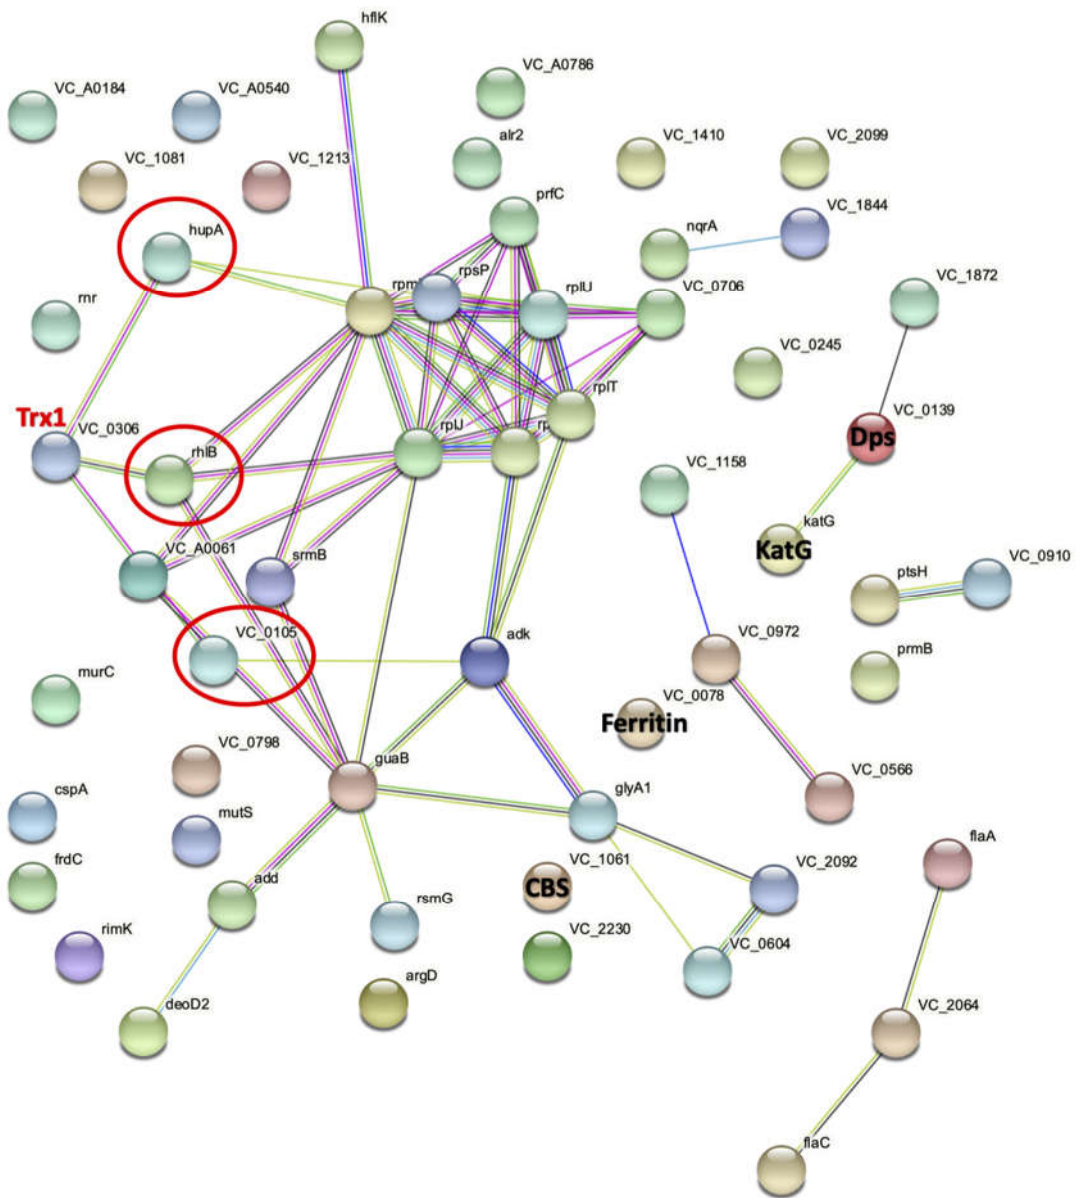

**S7 Fig. STRING network analysis of differentially up-regulated proteins in the proteome (S3 Table).**
