# Supplementary material for: CBS-derived H2S facilitates host colonization of Vibrio cholerae by promoting the iron-dependent catalase activity of KatB
Source: PubMed Central journal article supplement (PMC8324212; doi:10.1371/journal.ppat.1009763), 2021-07-20
Supplement: ppat.1009763.s008.pdf [file ppat.1009763.s008.pdf]

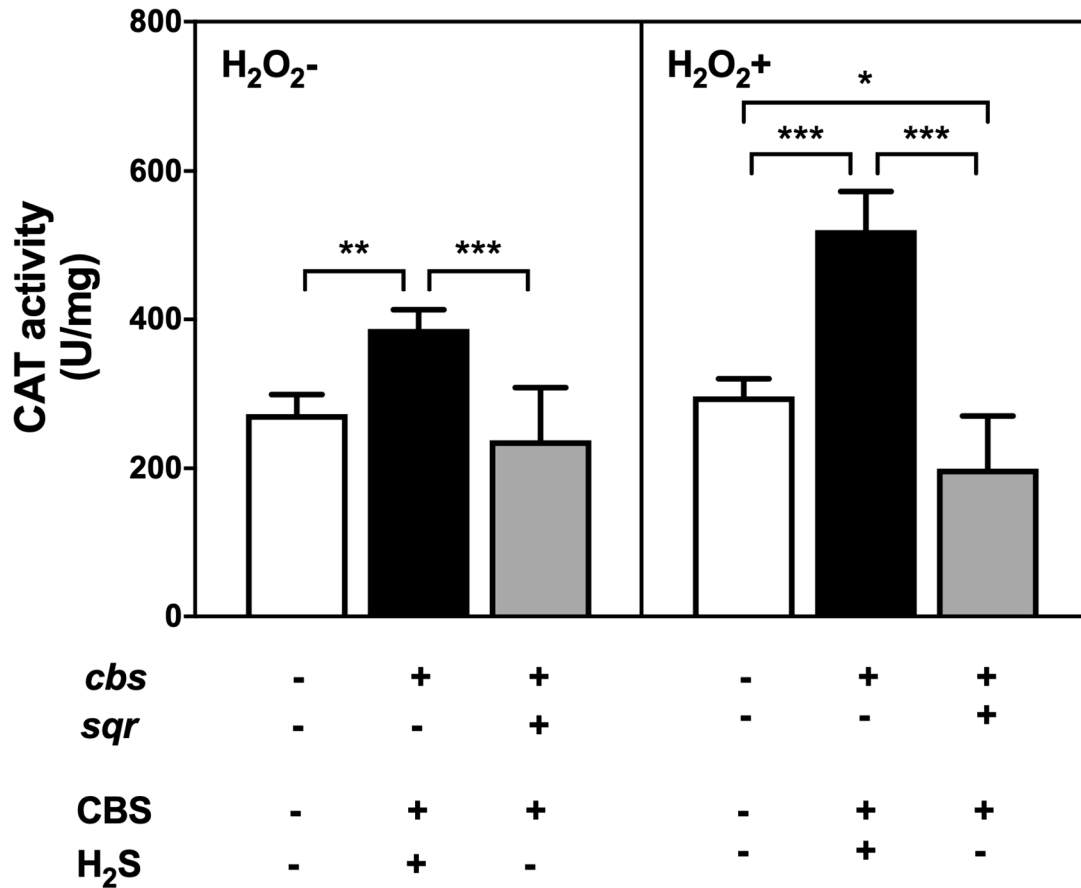

**S8 Fig. H<sub>2</sub>S is the determinant of *cbs* expression promoting catalase activity.**

Catalase activity in crude extracts of  $\Delta cbs$  strains containing vectors (*cbs*<sup>-</sup>*sqr*<sup>-</sup>; CBS<sup>-</sup>H<sub>2</sub>S<sup>-</sup>), P<sub>*tac-cbs*</sub> (*cbs*<sup>+</sup>*sqr*<sup>-</sup>; CBS<sup>+</sup>H<sub>2</sub>S<sup>+</sup>) only, or both of P<sub>*tac-cbs*</sub> and P<sub>*BAD-sqr*</sub> (*cbs*<sup>+</sup>*sqr*<sup>+</sup>; CBS<sup>+</sup>H<sub>2</sub>S<sup>+</sup>). Cells were grown in M9 minimal medium (M9 salts plus 2 mM MgSO<sub>4</sub>, 0.1 mM CaCl<sub>2</sub> and 0.2% casein acid hydrolysate), containing 200  $\mu$ M of IPTG and 0.02% arabinose, and treated with or without H<sub>2</sub>O<sub>2</sub> (1 mM, 20 min) at their mid-log phase. Three individual experiments were taken. Significance was determined by one-way ANOVA; *p*-value: \*, <0.05, \*\*, <0.01, \*\*\*, <0.001.
