# Supplementary material for: CBS-derived H2S facilitates host colonization of Vibrio cholerae by promoting the iron-dependent catalase activity of KatB
Source: PubMed Central journal article supplement (PMC8324212; doi:10.1371/journal.ppat.1009763), 2021-07-20
Supplement: ppat.1009763.s009.pdf [file ppat.1009763.s009.pdf]

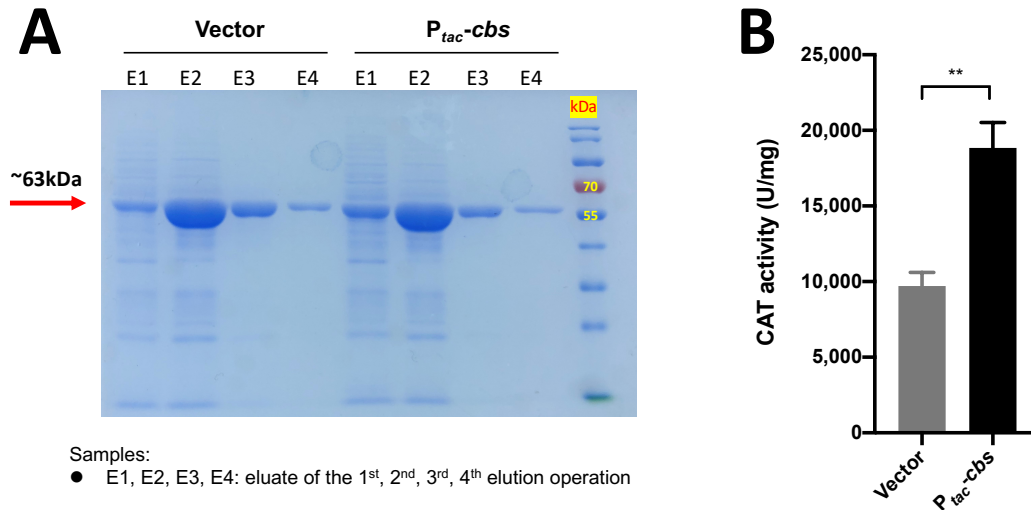

### S9 Fig. Purification of KatB protein.

Hig-tagged *V. cholerae* KatB was expressed in M9 minimal medium with 0.2% casein as only carbon source under pBAD promoter in triple-deletion mutant of *cbs*, *katB* and *katG*, with ( $P_{tac-cbs}$ ) or without (vector) additional *cbs* expression (A). Crude enzyme solution of cells was subjected to CAT activity determination (B), three replicates were sampled for each strain. Significance was determined by *t*-test; *p*-value: \*\*, <0.01.
