# Supplementary material for: CBS-derived H2S facilitates host colonization of Vibrio cholerae by promoting the iron-dependent catalase activity of KatB
Source: PubMed Central journal article supplement (PMC8324212; doi:10.1371/journal.ppat.1009763), 2021-07-20
Supplement: ppat.1009763.s010.pdf [file ppat.1009763.s010.pdf]

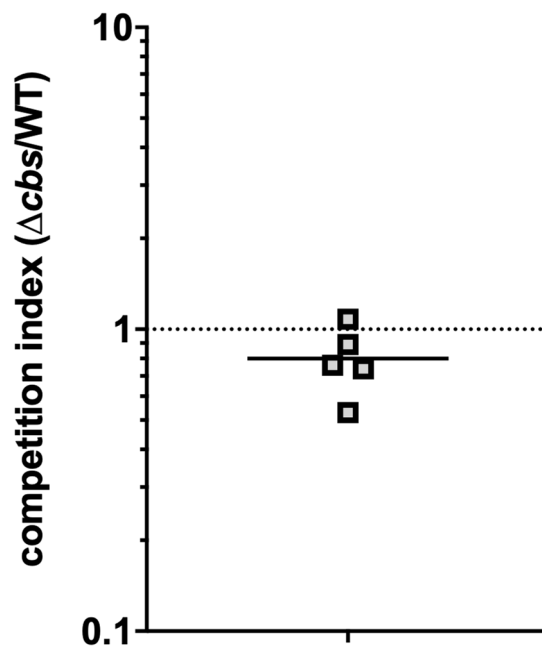

**S10 Fig. *cbs* deletion mutant has no defect in colonizing infant mouse.**

Infant CD1 mice were administrated with wild-type (WT) and  $\Delta cbs$ . Intestines were collected at 18 hrs post inoculation. Bacterial loads were quantified by plating.

Competition index (CI) was calculated as the ration of  $\Delta cbs$  to WT colonies and normalized with the input ratio.
