# Supplementary material for: CBS-derived H2S facilitates host colonization of Vibrio cholerae by promoting the iron-dependent catalase activity of KatB
Source: PubMed Central journal article supplement (PMC8324212; doi:10.1371/journal.ppat.1009763), 2021-07-20
Supplement: ppat.1009763.s011.pdf [file ppat.1009763.s011.pdf]

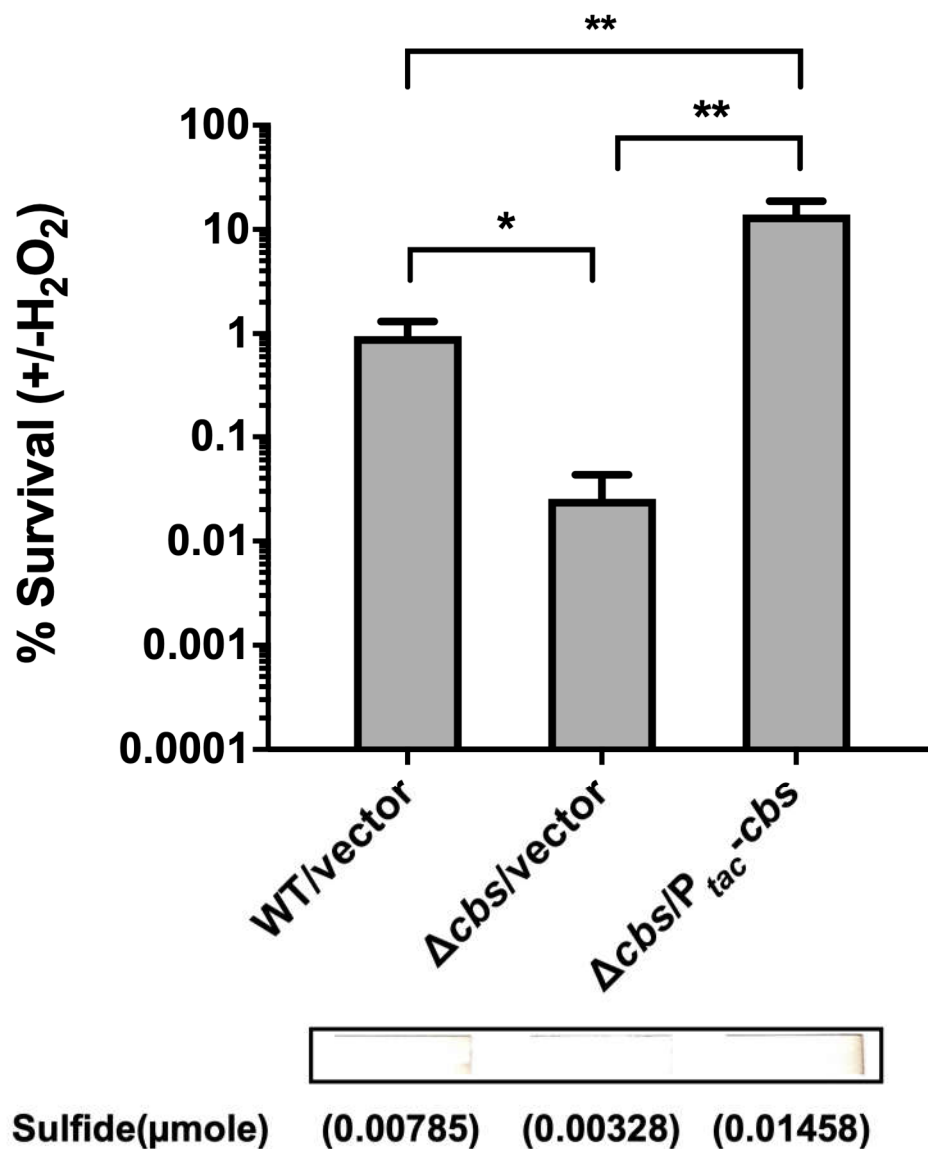

**S11 Fig. CBS-mediated H<sub>2</sub>S production and cell protection in the absence of exogenous cysteine.**

Strains were cultured in M9 medium with 0.2% glucose as the sole carbon source.

H<sub>2</sub>S production during growth was monitored with lead acetate paper strips, and viability of cells under H<sub>2</sub>O<sub>2</sub> challenge was examined. The paper strips were scanned

for semi-quantification of H<sub>2</sub>S yield with ImageJ and NaHS standard. Significance

was determined by *t*-test; *p*-value: \*, <0.05; \*\*, <0.01.
