# Supplementary material for: CBS-derived H2S facilitates host colonization of Vibrio cholerae by promoting the iron-dependent catalase activity of KatB
Source: PLoS Pathog. 2021 Jul 20;17(7):e1009763. doi: 10.1371/journal.ppat.1009763 (PMC8324212; doi:10.1371/journal.ppat.1009763)
Supplement: S2 Table — (DOCX) [file ppat.1009763.s014.docx]

**S2 Table. Primers for RT-qPCR in this study.**

| | **target gene** | **primer name** | **sequence** | | --- | --- | --- | | *16S rRNA* | 16S-RT-F | 5' CGGTAATACGGAGGGTGCAA 3' | |  | 16S-RT-R | 5' CACCTGCATGCGCTTTACG 3' | | *katB* (VC1585) | katB-RT-F | 5' ATTTGCGTATGCCGATACAC 3' | |  | katB-RT-R | 5' GACTGGGTTGGTAGTTAATGTC 3' | | *katG* (VC1560) | katG-RT-F | 5' GGTAAAGTTCTGGCGGTATTAG 3' | |  | katG-RT-R | 5' GACTCAACATCGGTTTGTTC 3' | | *ahpC* (VC0731) | ahpC-RT-F | 5' TCACAACGCATGGCGTAAC 3' | |  | ahpC-RT-R | 5' CTTCGTCGATCAGGAATGAACC 3' | | *prxA* (VC2637) | prxA-RT-F | 5' CTTGGGTCAATGTGACTAGC 3' | |  | prxA-RT-R | 5' ACCGATACGCACAGAATG 3' | | *ohrA* (VCA1006) | ohrA-RT-F | 5' AACGCGATTCTGCACGTC 3' | |  | ohrA-RT-R | 5' CAACGGTCACCAACTGTCTG 3' | | *sodA* (VC2694) | sodA-RT-F | 5' CATGGAGGTGCATTACAG 3' | |  | sodA-RT-R | 5' CAGCGTTAGGCTTCATAC 3' | | *sodB* (VC2045) | sodB-RT-F | 5' AAAGCTGACGGCACTCTG 3' | |  | sodB-RT-R | 5' GATGTAGTACGCGTGTTCC 3' | | *sodC* (VC1583) | sodC-RT-F | 5' CCGTAACTGATAGCGAGTATG 3' | |  | sodC-RT-R | 5' TCTTTGGACGAGGTTTCAC 3' | |  |
| --- | --- | --- | --- | --- | --- | --- | --- | --- | --- | --- | --- | --- | --- | --- | --- | --- | --- | --- | --- | --- | --- | --- | --- | --- | --- | --- | --- | --- | --- | --- | --- | --- | --- | --- | --- | --- | --- | --- | --- | --- | --- | --- | --- | --- | --- | --- | --- | --- | --- | --- | --- | --- | --- | --- | --- | --- | --- | --- |
